# Supplementary material
Source: publisher figshare collection journal article supplement (https://acs.figshare.com/ndownloader/files/3725017)

**Silver Accumulation in the Green Microalga *Coccomyxa actinabiotis*:  
Toxicity, *in Situ* Speciation and Localization Investigated using  
Synchrotron XAS, XRD and TEM**

Thomas Leonardo, Emmanuel Farhi, Stéphanie Pouget, Sylvie Motellier, Anne-Marie Boisson, Dipanjan Banerjee, Fabrice Rébeillé, Christophe den Auwer, and Corinne Rivasseau\*

Supplementary Information:

Number of pages: 4

Number of figures: 2

Number of tables: 1

**Supplementary Table S1: Identical to Table 1 with the list of all the Ag-Ag distances included in the fitting procedure of algae samples exposed to silver at 10<sup>-3</sup> and 10<sup>-4</sup> M.**

| Sample                                                        | Ag-S                                                     | Ag-Ag                                                                                                                                                                                                                                                                                                                                                                                                   | $S_0^2$ , $\Delta e_0$ , R factor, $\chi^2_R$                                     |
|---------------------------------------------------------------|----------------------------------------------------------|---------------------------------------------------------------------------------------------------------------------------------------------------------------------------------------------------------------------------------------------------------------------------------------------------------------------------------------------------------------------------------------------------------|-----------------------------------------------------------------------------------|
| Algae exposed to<br>10 <sup>-3</sup> M Ag <sup>+</sup> (15 K) | 0.7(1) S at 2.46(1) Å<br>$\sigma^2 = 0.0057 \text{ Å}^2$ | 3.9(1) Ag at 2.87(1) Å<br>$\sigma^2 = 0.0035 \text{ Å}^2$<br>2.0 Ag at 4.06 Å<br>$\sigma^2 = 0.0056 \text{ Å}^2$<br>7.8 Ag at 4.98 Å<br>$\sigma^2 = 0.0054 \text{ Å}^2$<br>31.2 Ag at 5.36 Å*<br>$\sigma^2 = 0.0039 \text{ Å}^2$<br>3.9 Ag at 5.75 Å<br>$\sigma^2 = 0.0062 \text{ Å}^2$<br>7.8 Ag at 5.75 Å*<br>$\sigma^2 = 0.0069 \text{ Å}^2$<br>3.9 Ag at 5.75 Å*<br>$\sigma^2 = 0.0069 \text{ Å}^2$ | $S_0^2 = 0.9$<br>$\Delta e_0 = 2.53(30)$<br>R factor = 0.030<br>$\chi^2_R = 0.10$ |
| Algae exposed to<br>10 <sup>-4</sup> M Ag <sup>+</sup> (15 K) | 0.7(1) S at 2.46(1) Å<br>$\sigma^2 = 0.0050 \text{ Å}^2$ | 3.6(1) Ag at 2.87(2) Å<br>$\sigma^2 = 0.0032 \text{ Å}^2$<br>1.8 Ag at 4.06 Å<br>$\sigma^2 = 0.0056 \text{ Å}^2$<br>7.2 Ag at 4.98 Å<br>$\sigma^2 = 0.0049 \text{ Å}^2$<br>28.8 Ag at 5.36 Å*<br>$\sigma^2 = 0.0036 \text{ Å}^2$<br>3.6 Ag at 5.75 Å<br>$\sigma^2 = 0.0047 \text{ Å}^2$<br>7.2 Ag at 5.75 Å*<br>$\sigma^2 = 0.0064 \text{ Å}^2$<br>3.6 Ag at 5.75 Å*<br>$\sigma^2 = 0.0064 \text{ Å}^2$ | $S_0^2 = 0.9$<br>$\Delta e_0 = 1.73(24)$<br>R factor = 0.019<br>$\chi^2_R = 0.19$ |

Numbers in italics are linked by geometry to the parameters of the first path. \* indicates multiple scattering paths.

**Supplementary Figure S1.** Size distribution of nanoparticles in microalgae (Normalized particle number as a function of particle size, in nm).

(A) Size distribution depending on silver concentration in microalgae exposed to  $10^{-2}$  M (solid line) and  $10^{-4}$  M (dashed line)  $\text{Ag}^+$ ; (B) Size distribution depending on subcellular localization in microalgae exposed to  $10^{-2}$  M  $\text{Ag}^+$ : chloroplast (solid line), mitochondria (dashed line) and vacuoles (dash-dotted line). The statistical analysis has been performed with 200 particles at  $10^{-2}$  M and 70 particles at  $10^{-4}$  M.

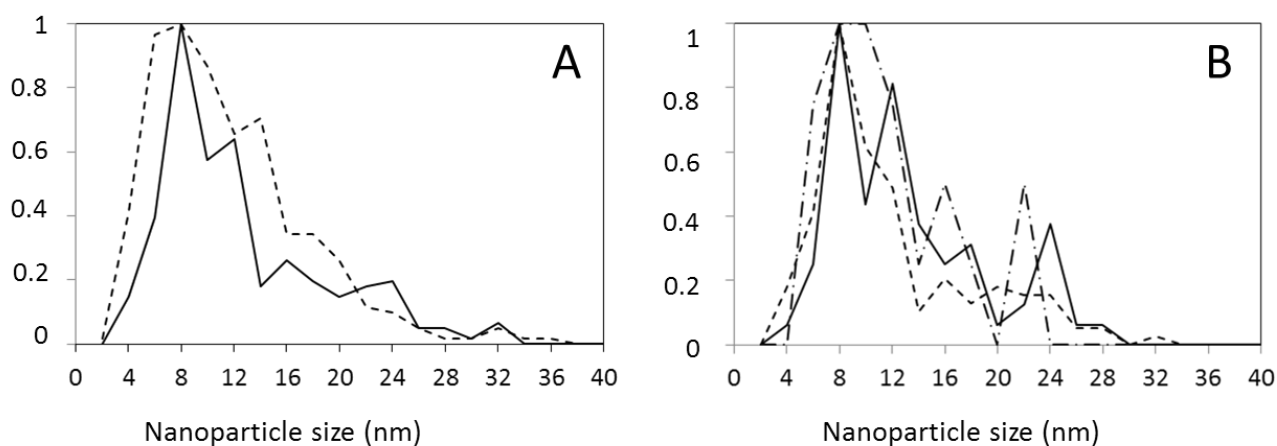

**Supplementary Figure S2.** Physiological impact of silver on *C. actinabiotis* microalgae exposed to various  $\text{Ag}^+$  concentrations and recovery thereafter. Change in (A) the photosynthetic yield (photochemical yield  $F_v/F_m$  of photosystem II) and in (B) algal growth (cellular density) as a function of time. Microalgae at  $2 \text{ g}_{\text{FW}}\cdot\text{L}^{-1}$  were exposed to  $\text{Ag}^+$  in ultrapure water for 2 h and transferred into a silver-free growth medium, indicated by the “T” arrow on the graphs. The first value at time zero in Figure S2A corresponds to the photochemical yield just before silver addition. Silver addition is indicated by the “ $\text{Ag}^+$ ” arrow on the graph.

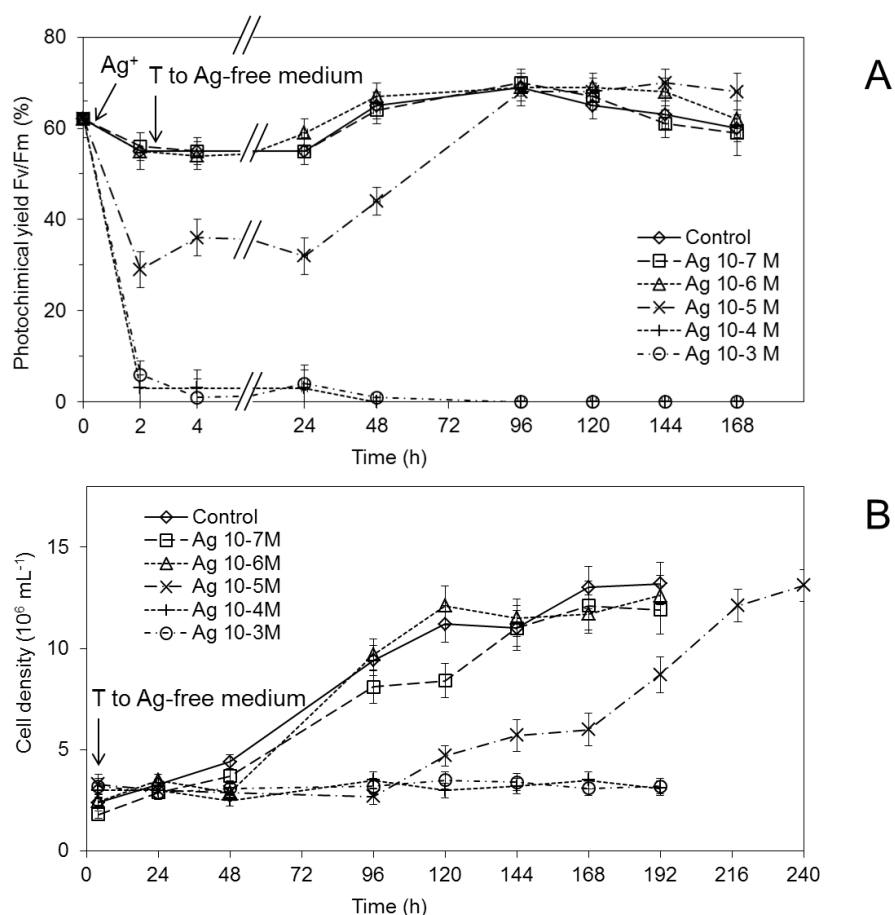

Supplement: Supplementary file 1 [file 3725017]
